# Supplementary material
Source: publisher figshare collection journal article supplement (https://karger.figshare.com/ndownloader/files/15630572)
Supplement: Supplementary file 1 [file 15630572]

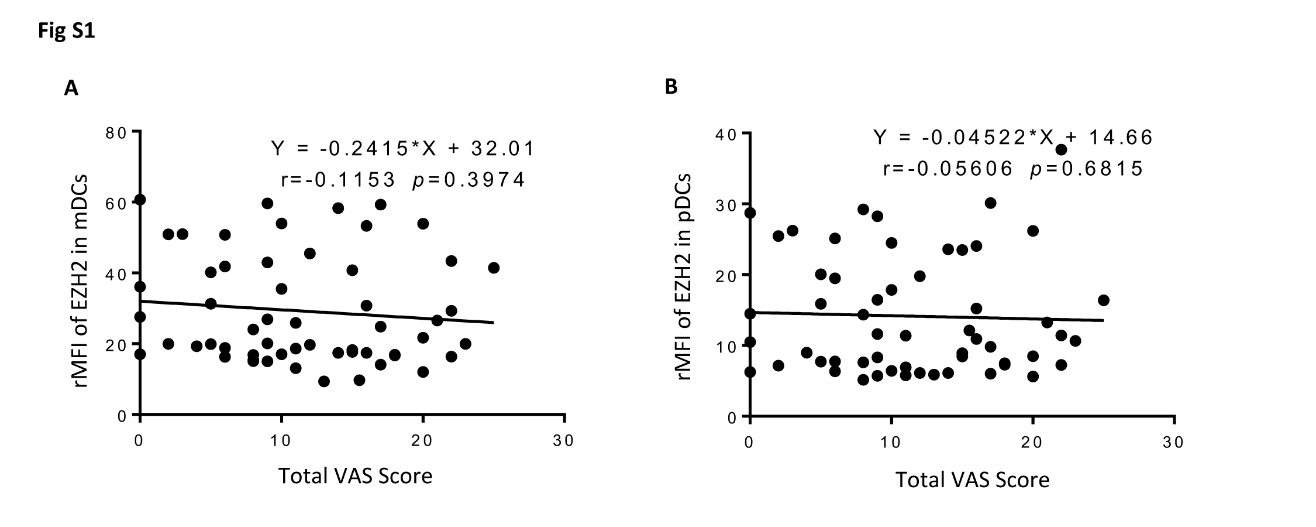


**Figure S1. The correlation between EZH2 expression in circulating DC subsets and clinical symptom in allergic rhinitis patients receiving allergen immunotherapy.**

The correlation analyses between EZH2 expression in circulating DC subsets, including mDCs (A) and pDCs (B), and total visual analog scale (VAS) Score are shown. The total VAS score rated 6 symptoms (including nasal obstruction, rhinorrhea, sneezing, nasal prupritus, itchy eyes, and watery eyes) from absent (0) to very severe (10). The total VAS score ranged from 0 to 60 for all combined symptoms.[[1](#_ENREF_1), [2](#_ENREF_2)] The relative median fluorescence intensity (rMFI) shows the expression of EZH2 in DCs subsets normalized to isotype control staining. n=56.

1. Brozek JL, Bousquet J, Agache I, Agarwal A, Bachert C, Bosnic-Anticevich S, Brignardello-Petersen R, Canonica GW, Casale T, Chavannes NH *et al*: **Allergic Rhinitis and its Impact on Asthma (ARIA) guidelines-2016 revision**. *The Journal of allergy and clinical immunology* 2017, **140**(4):950-958.

2. Bousquet PJ, Combescure C, Neukirch F, Klossek JM, Mechin H, Daures JP, Bousquet J: **Visual analog scales can assess the severity of rhinitis graded according to ARIA guidelines**. *Allergy* 2007, **62**(4):367-372.

**Table S1. Test statistics of co-stimulatory molecules expression at indicated doses of EZH2 inhibitor DZNep**

| **Co-stimulatory molecule** | **Comparison** | **Mean Difference** | **95% CI of difference** | ***p*-value** |
| --- | --- | --- | --- | --- |
| CD80 | 0 vs 1 μM | 0.2863 | -0.05319 to 0.6259 | >0.05 |
| 0 vs 3 μM | 0.3484 | 0.03459 to 0.6622 | <0.05 |
| 0 vs 5 μM | 0.3694 | 0.1971 to 0.5417 | <0.05 |
| 0 vs 10 μM | 0.4102 | 0.3048 to 0.5155 | <0.01 |
| CD86 | 0 vs 1 μM | 0.3254 | 0.05201 to 0.5989 | <0.05 |
| 0 vs 3 μM | 0.4465 | -0.2031 to 1.096 | >0.05 |
| 0 vs 5 μM | 0.4449 | 0.1824 to 0.7074 | <0.05 |
| 0 vs 10 μM | 0.4842 | 0.1052 to 0.8632 | <0.05 |
| CD83 | 0 vs 1 μM | 0.1381 | -0.03227 to 0.3085 | >0.05 |
| 0 vs 3 μM | 0.1925 | -0.04939 to 0.4344 | >0.05 |
| 0 vs 5 μM | 0.2014 | 0.07007 to 0.3328 | <0.05 |
| 0 vs 10 μM | 0.2004 | 0.1294 to 0.2713 | <0.01 |
| MHC II | 0 vs 1 μM | 0.1620 | -0.2232 to 0.5472 | >0.05 |
| 0 vs 3 μM | 0.1604 | -0.4765 to 0.7974 | >0.05 |
| 0 vs 5 μM | 0.1109 | -0.1386 to 0.3604 | >0.05 |
| 0 vs 10 μM | 0.1811 | 0.03952 to 0.3226 | <0.05 |
